# Supplementary material for: NT-proBNP as a Potential Marker of Cardiovascular Damage in Children with Chronic Kidney Disease
Source: MDPI journal article supplement (doi:10.3390/jcm10194344), 2021-09-24
Supplement: s1 [file s1]

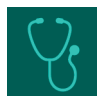

**Supplementary Table S1.** Correlations of age with NT-proBNP, clinical, and biochemical parameters in the study group.

| Analyzed parameter                                     | R      | P     |
|--------------------------------------------------------|--------|-------|
| Age (years) vs. NT-proBNP(pg/mL)                       | −0.166 | 0.320 |
| Age (years) vs. BMI Z-score                            | −0.248 | 0.133 |
| Age (years) vs. Number of antihypertensive medications | 0.123  | 0.463 |
| Age (years) vs. Creatinine (mg/dL)                     | 0.249  | 0.133 |
| Age (years) vs. GFR (mL/min/1.73 m <sup>2</sup> )      | −0.047 | 0.781 |
| Age (years) vs. Urea (mg/dL)                           | −0.044 | 0.792 |
| Age (years) vs. Hemoglobin (g/dL)                      | 0.045  | 0.790 |
| Age (years) vs. Albumin (g/dL)                         | −0.007 | 0.969 |
| Age (years) vs. Cholesterol (mg/dL)                    | −0.145 | 0.391 |
| Age (years) vs. LDL-cholesterol (mg/dL)                | −0.285 | 0.096 |
| Age (years) vs. HDL-cholesterol (mg/dL)                | 0.119  | 0.478 |
| Age (years) vs. Triglycerides (mg/dL)                  | 0.044  | 0.798 |
| Age (years) vs. Calcium (mg/dL)                        | −0.336 | 0.039 |
| Age (years) vs. Inorganic phosphate (mg/dL)            | −0.397 | 0.014 |
| Age (years) vs. Intact parathormone (pg/mL)            | 0.016  | 0.928 |
| Age (years) vs. Alkaline Phosphatase (IU/L)            | −0.590 | 0.001 |
| Age (years) vs. 25(OH)D (ng/mL)                        | −0.032 | 0.850 |
| Age (years) vs. Uric acid (mg/dL)                      | 0.199  | 0.230 |
| Age (years) vs. pH                                     | −0.459 | 0.005 |
| Age (years) vs. HCO <sub>3</sub> <sup>−</sup> (mmol/L) | 0.094  | 0.580 |
| Age (years) vs. BE (mmol/L)                            | 0.063  | 0.710 |

NT-proBNP—N-terminal pro-brain natriuretic peptide, GFR—glomerular filtration rate according to Schwartz formula, LDL—low-density lipoprotein, HDL—high-density lipoprotein, 25(OH)D—25-hydroxy-vitamin D, pH—power of hydrogen, HCO<sub>3</sub><sup>−</sup>—bicarbonate, BE—base excess.
