# Supplementary material for: NT-proBNP as a Potential Marker of Cardiovascular Damage in Children with Chronic Kidney Disease
Source: MDPI journal article supplement (doi:10.3390/jcm10194344), 2021-09-24
Supplement: s1 [file s1]

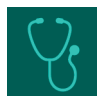

**Supplementary Table S2.** Correlations of age with blood pressure, arterial, and heart parameters in the study group.

| Analyzed parameter                            | R      | P      |
|-----------------------------------------------|--------|--------|
| <b>Blood pressure and heart rate</b>          |        |        |
| Age (years) vs. peripheral office SBP (mmHg)  | 0.388  | 0.046  |
| Age (years) vs. peripheral office SBP Z-score | −0.096 | 0.634  |
| Age (years) vs. peripheral office DBP (mmHg)  | 0.493  | 0.009  |
| Age (years) vs. peripheral office DBP Z-score | 0.286  | 0.148  |
| Age (years) vs. peripheral office MAP (mmHg)  | 0.360  | 0.065  |
| Age (years) vs. peripheral office PP (mmHg)   | −0.070 | 0.728  |
| Age (years) vs. aortic office SBP (mmHg)      | 0.310  | 0.116  |
| Age (years) vs. aortic office DBP (mmHg)      | 0.490  | 0.009  |
| Age (years) vs. aortic office MAP (mmHg)      | 0.360  | 0.065  |
| Age (years) vs. aortic office PP (mmHg)       | −0.368 | 0.059  |
| Age (years) vs. heart rate (bpm)              | −0.281 | 0.156  |
| <b>Arterial structure and function</b>        |        |        |
| Age (years) vs. cIMT (mm)                     | 0.311  | 0.115  |
| Age (years) vs. cIMT Z-score                  | 0.005  | 0.982  |
| Age (years) vs. AP (mmHg)                     | −0.398 | 0.040  |
| Age (years) vs. AP/PP (AIx) (%)               | −0.474 | 0.013  |
| Age (years) vs. P2/P1 (AIx) (%)               | −0.521 | 0.005  |
| Age (years) vs. AIx75HR (%)                   | −0.396 | 0.041  |
| Age (years) vs. SEVR (%)                      | 0.324  | 0.099  |
| Age (years) vs. PWV (m/s)                     | 0.490  | 0.011  |
| Age (years) vs. PWV Z-score                   | 0.090  | 0.677  |
| <b>Heart structure and function</b>           |        |        |
| Age (years) vs. IVSDd (mm)                    | 0.510  | 0.002  |
| Age (years) vs. LVDd (mm)                     | 0.727  | <0.001 |
| Age (years) vs. LVPWd (mm)                    | 0.660  | <0.001 |
| Age (years) vs. LAD (mm)                      | 0.459  | 0.012  |
| Age (years) vs. RWT                           | 0.286  | 0.101  |
| Age (years) vs. LVM [g]                       | 0.703  | <0.001 |
| Age (years) vs. LVMI (g/m <sup>2.7</sup> )    | −0.074 | 0.676  |
| Age (years) vs. SF (%)                        | −0.088 | 0.651  |
| Age (years) vs. EF (%)                        | −0.117 | 0.547  |
| Age (years) vs. E (cm/s)                      | 0.160  | 0.406  |
| Age (years) vs. A (cm/s)                      | −0.393 | 0.035  |
| Age (years) vs. E/A                           | 0.464  | 0.011  |
| Age (years) vs. Edt (ms)                      | 0.007  | 0.971  |
| Age (years) vs. E' (cm/s)                     | 0.438  | 0.017  |
| Age (years) vs. A' (cm/s)                     | −0.005 | 0.979  |
| Age (years) vs. E/E'                          | −0.196 | 0.308  |
| Age (years) vs. IVRT (ms)                     | −0.280 | 0.142  |
| Age (years) vs. IVCT (ms)                     | −0.109 | 0.582  |
| Age (years) vs. C' (m/s)                      | −0.145 | 0.453  |

SBP—systolic blood pressure, DBP—diastolic blood pressure, MAP—mean arterial pressure, PP—pulse pressure, cIMT—common carotid artery intima media thickness, AP—augmentation pressure, P—peak pressure, AIx—augmentation index, AIx75HR—augmentation index normalized to heart rate 75 beats per minute, SEVR—subendocardial viability ratio, PWV—aortic pulse wave velocity, d—end-diastolic phase, IVS—interventricular septum transverse diameter, LVD—left

ventricular diastolic diameter, LVPW—left ventricular posterior wall diameter, LAD—left atrial transverse diameter, RWT—relative wall thickness, LVM—left ventricular mass, LVMI—left ventricular mass index, SF—shortening fraction, EF—ejection fraction, E—peak wave velocity in early diastole, A—peak wave velocity in late diastole caused by atrial contraction, Edt—E deceleration time, E'—mean value of peak medial and lateral mitral annular velocity during early filling, A'—mean value of peak medial and lateral mitral annular velocity during late filling, IVRT—isovolumetric relaxation time, IVCT—isovolumetric contraction time, C'—maximum speed of systolic wave.
